# Supplementary material for: Identification of a compound heterozygote in LYST gene: a case report on Chediak-Higashi syndrome
Source: BMC Med Genet. 2020 Jan 6;21:4. doi: 10.1186/s12881-019-0922-8 (PMC6943916; doi:10.1186/s12881-019-0922-8)
Supplement: Supplementary file 5 — Additional file 5: Table S4. Reported pathogenic and likely pathogenic mutations in the LYST gene from the ClinVar database. [file 12881_2019_922_MOESM5_ESM.xlsx]

## Sheet: Sheet2
Supplementary Table 4. Reported pathogenic and likely pathogenic mutations in ClinVar.
Name	Location (reference genome version: GRCh37)	VariationID	AlleleID	Clinical significance (Last reviewed)	Condition(s)	Review status
NM_000081.3(LYST):c.6694G>T (p.Gly2232Ter)	235922459	190995	188801	Likely pathogenic	not provided	criteria provided, single submitter
NM_000081.3(LYST):c.4688+1G>A	235952000	429517	421222	Likely pathogenic(Last reviewed: Apr 27, 2017)	not provided	criteria provided, single submitter
NM_000081.3(LYST):c.2971C>A (p.His991Asn)	235969465	218370	215097	Likely pathogenic(Last reviewed: Dec 15, 2015)	Recurrent infections	criteria provided, single submitter
NM_000081.3(LYST):c.7159C>T (p.Arg2387Ter)	235918848	546376	536578	Likely pathogenic(Last reviewed: May 29, 2018)	not provided	criteria provided, single submitter
GRCh37/hg19 1q42.3-44(chr1:235374095-249224684)x1	235374095 - 249224684	397194	384087	Pathogenic	See cases	no assertion criteria provided
GRCh37/hg19 1q42.2-43(chr1:232226609-241010904)x1	232226609 - 241010904	396579	383472	Pathogenic	See cases	no assertion criteria provided
GRCh37/hg19 1q41-44(chr1:214697099-249224684)x3	214697099 - 249224684	396039	382932	Pathogenic	See cases	no assertion criteria provided
GRCh37/hg19 1q31.3-44(chr1:195483439-249213000)x3	195483439 - 249213000	394081	380974	Pathogenic	See cases	no assertion criteria provided
GRCh37/hg19 1q42.2-44(chr1:231670870-249213000)x3	231670870 - 249213000	393997	380890	Pathogenic	See cases	no assertion criteria provided
GRCh38/hg38 1q42.2-44(chr1:232097468-248918610)x1	232233214 - 249212809	60112	74707	Pathogenic(Last reviewed: Aug 12, 2011)	See cases	criteria provided, single submitter
GRCh38/hg38 1q42.11-44(chr1:224096488-248918469)x3	224284190 - 249212668	58137	72732	Pathogenic(Last reviewed: Aug 12, 2011)	See cases	criteria provided, single submitter
GRCh38/hg38 1q41-44(chr1:223887780-248891309)x3	224075482 - 249185508	58135	72730	Pathogenic(Last reviewed: Aug 12, 2011)	See cases	criteria provided, single submitter
GRCh38/hg38 1q41-44(chr1:223828500-248891309)x3	224016202 - 249185508	58133	72728	Pathogenic(Last reviewed: Aug 12, 2011)	See cases	criteria provided, single submitter
GRCh38/hg38 1q32.2-44(chr1:209646207-248931113)x3	209819552 - 249225312	58116	72711	Pathogenic(Last reviewed: Aug 12, 2011)	See cases	criteria provided, single submitter
GRCh38/hg38 1q42.13-44(chr1:230106271-243677283)x1	230242018 - 243840585	57387	71982	Pathogenic(Last reviewed: Aug 12, 2011)	See cases	criteria provided, single submitter
GRCh38/hg38 1q32.3-44(chr1:214023812-248918469)x3	214197155 - 249212668	57302	71897	Pathogenic(Last reviewed: Aug 12, 2011)	See cases	criteria provided, single submitter
GRCh38/hg38 1q41-44(chr1:223347693-248918469)x3	223521035 - 249212668	57010	71605	Pathogenic(Last reviewed: Aug 12, 2011)	See cases	criteria provided, single submitter
GRCh38/hg38 1q42.12-44(chr1:225438480-248787200)x3	225626182 - 249060210	154381	164135	Pathogenic(Last reviewed: Aug 18, 2010)	See cases	no assertion criteria provided
GRCh37/hg19 1p36.33-q44(chr1:849467-249224684)x3	849467 - 249224684	442386	436048	Pathogenic(Last reviewed: Dec 2, 2014)	See cases	no assertion criteria provided
GRCh38/hg38 1q42.13-44(chr1:229022909-248918469)x3	229158656 - 249212668	147487	157238	Pathogenic(Last reviewed: Dec 22, 2010)	See cases	no assertion criteria provided
NM_000081.3(LYST):c.10395delA (p.Gly3466Alafs)	235860552	65530	76438	Pathogenic(Last reviewed: Feb 16, 2012)	Chediak-Higashi syndrome	no assertion criteria provided
NM_000081.3(LYST):c.10127A>G (p.Asn3376Ser)	235872407	65529	76437	Pathogenic(Last reviewed: Feb 16, 2012)	Chediak-Higashi syndrome	no assertion criteria provided
NM_000081.3(LYST):c.9893delT (p.Phe3298Serfs)	235875389	65552	76460	Pathogenic(Last reviewed: Feb 16, 2012)	Chediak-Higashi syndrome	no assertion criteria provided
NM_000081.3(LYST):c.9590delA (p.Tyr3197Leufs)	235880049	3812	18851	Pathogenic(Last reviewed: Feb 16, 2012)	Chediak-Higashi syndrome, childhood type	no assertion criteria provided
NM_000081.3(LYST):c.9228_9229insTTCTTTCAGT (p.Lys3077Phefs)	235887414 - 235887415	65550	76458	Pathogenic(Last reviewed: Feb 16, 2012)	Chediak-Higashi syndrome	no assertion criteria provided
NM_000081.3(LYST):c.9107_9162del56 (p.Gly3036Glufs)	235891376 - 235891431	40979	49401	Pathogenic(Last reviewed: Feb 16, 2012)	Chediak-Higashi syndrome	no assertion criteria provided
NM_000081.3(LYST):c.8583G>A (p.Trp2861Ter)	235897159	65549	76457	Pathogenic(Last reviewed: Feb 16, 2012)	Chediak-Higashi syndrome	no assertion criteria provided
NM_000081.3(LYST):c.8428G>A (p.Glu2810Lys)	235897890	65548	76456	Pathogenic(Last reviewed: Feb 16, 2012)	Chediak-Higashi syndrome	no assertion criteria provided
NM_000081.3(LYST):c.7555delT (p.Tyr2519Ilefs)	235915377	65547	76455	Pathogenic(Last reviewed: Feb 16, 2012)	Chediak-Higashi syndrome	no assertion criteria provided
NM_000081.3(LYST):c.7060_7066delCTATTAG (p.Leu2354Metfs)	235918941 - 235918947	65546	76454	Pathogenic(Last reviewed: Feb 16, 2012)	Chediak-Higashi syndrome	no assertion criteria provided
NM_000081.3(LYST):c.6078C>A (p.Tyr2026Ter)	235929422	65545	76453	Pathogenic(Last reviewed: Feb 16, 2012)	Chediak-Higashi syndrome	no assertion criteria provided
NM_000081.3(LYST):c.5996T>A (p.Val1999Asp)	235929504	3817	18856	Pathogenic(Last reviewed: Feb 16, 2012)	Chediak-Higashi syndrome, adult type	no assertion criteria provided
NM_000081.3(LYST):c.5317delA (p.Arg1773Aspfs)	235940506	65544	76452	Pathogenic(Last reviewed: Feb 16, 2012)	Chediak-Higashi syndrome	no assertion criteria provided
NM_000081.3(LYST):c.5061T>A (p.Tyr1687Ter)	235944318	65543	76451	Pathogenic(Last reviewed: Feb 16, 2012)	Chediak-Higashi syndrome	no assertion criteria provided
NM_000081.3(LYST):c.4688G>A (p.Arg1563His)	235952001	3816	18855	Pathogenic(Last reviewed: Feb 16, 2012)	Chediak-Higashi syndrome, adult type	no assertion criteria provided
NM_000081.3(LYST):c.4361C>A (p.Ala1454Asp)	235955181	65542	76450	Pathogenic(Last reviewed: Feb 16, 2012)	Chediak-Higashi syndrome	no assertion criteria provided
NM_000081.3(LYST):c.4274delT (p.Leu1425Tyrfs)	235955268	65541	76449	Pathogenic(Last reviewed: Feb 16, 2012)	Chediak-Higashi syndrome	no assertion criteria provided
NM_000081.3(LYST):c.4052C>G (p.Ser1351Ter)	235956867	65540	76448	Pathogenic(Last reviewed: Feb 16, 2012)	Chediak-Higashi syndrome	no assertion criteria provided
NM_000081.3(LYST):c.3434dupA (p.His1145Glnfs)	235967925	65539	76447	Pathogenic(Last reviewed: Feb 16, 2012)	Chediak-Higashi syndrome	no assertion criteria provided
NM_000081.3(LYST):c.3085C>T (p.Gln1029Ter)	235969351	3814	18853	Pathogenic(Last reviewed: Feb 16, 2012)	Chediak-Higashi syndrome, childhood type	no assertion criteria provided
NM_000081.3(LYST):c.3073_3074delAA (p.Asn1025Glnfs)	235969362 - 235969363	65538	76446	Pathogenic(Last reviewed: Feb 16, 2012)	Chediak-Higashi syndrome	no assertion criteria provided
NM_000081.3(LYST):c.2623delT (p.Tyr875Metfs)	235969813	3815	18854	Pathogenic(Last reviewed: Feb 16, 2012)	Chediak-Higashi syndrome, childhood type	no assertion criteria provided
NM_000081.3(LYST):c.2454delA (p.Ala819Hisfs)	235969982	65536	76444	Pathogenic(Last reviewed: Feb 16, 2012)	Chediak-Higashi syndrome	no assertion criteria provided
NM_000081.3(LYST):c.2413delG (p.Glu805Asnfs)	235970023	65535	76443	Pathogenic(Last reviewed: Feb 16, 2012)	Chediak-Higashi syndrome	no assertion criteria provided
NM_000081.3(LYST):c.1902dupA (p.Ala635Serfs)	235972216	3811	18850	Pathogenic(Last reviewed: Feb 16, 2012)	Chediak-Higashi syndrome, childhood type	no assertion criteria provided
NM_000081.3(LYST):c.1540C>T (p.Arg514Ter)	235972578	65533	76441	Pathogenic(Last reviewed: Feb 16, 2012)	Chediak-Higashi syndrome	no assertion criteria provided
NM_000081.3(LYST):c.1467delG (p.Glu489Aspfs)	235972651	3808	18847	Pathogenic(Last reviewed: Feb 16, 2012)	Chediak-Higashi syndrome, childhood type	no assertion criteria provided
NM_000081.3(LYST):c.148C>T (p.Arg50Ter)	235993570	3813	18852	Pathogenic(Last reviewed: Feb 16, 2012)	Chediak-Higashi syndrome, childhood type	no assertion criteria provided
NM_000081.3(LYST):c.118_119insG (p.Ala40Glyfs)	235993600	3810	18849	Pathogenic(Last reviewed: Feb 16, 2012)	Chediak-Higashi syndrome, childhood type	no assertion criteria provided
NM_000081.3(LYST):c.11173G>A (p.Gly3725Arg)	235827787	180631	178787	Pathogenic(Last reviewed: Jan 15, 2015)	Chediak-Higashi syndrome	no assertion criteria provided
NM_000081.3(LYST):c.11102G>T (p.Cys3701Phe)	235827858	180630	178797	Pathogenic(Last reviewed: Jan 15, 2015)	Chediak-Higashi syndrome	no assertion criteria provided
NM_000081.3(LYST):c.9827_9832delATACAA (p.Asn3276_Thr3277del)	235875450 - 235875455	180629	178788	Pathogenic(Last reviewed: Jan 15, 2015)	Chediak-Higashi syndrome	no assertion criteria provided
NM_000081.3(LYST):c.8281A>T (p.Arg2761Ter)	235904799	180628	178789	Pathogenic(Last reviewed: Jan 15, 2015)	Chediak-Higashi syndrome	no assertion criteria provided
NM_000081.3(LYST):c.7982C>G (p.Ser2661Ter)	235907448	180627	178790	Pathogenic(Last reviewed: Jan 15, 2015)	Chediak-Higashi syndrome	no assertion criteria provided
NM_000081.3(LYST):c.5541_5542delAA (p.Arg1848Serfs)	235938305 - 235938306	180626	178791	Pathogenic(Last reviewed: Jan 15, 2015)	Chediak-Higashi syndrome	no assertion criteria provided
NM_000081.3(LYST):c.5506C>T (p.Arg1836Ter)	235938341	180625	178792	Pathogenic(Last reviewed: Jan 15, 2015)	Chediak-Higashi syndrome	no assertion criteria provided
NM_000081.3(LYST):c.3944dupC (p.Val1316Cysfs)	235963682	180624	178793	Pathogenic(Last reviewed: Jan 15, 2015)	Chediak-Higashi syndrome	no assertion criteria provided
NM_000081.3(LYST):c.3622C>T (p.Gln1208Ter)	235966298	180623	178794	Pathogenic(Last reviewed: Jan 15, 2015)	Chediak-Higashi syndrome	no assertion criteria provided
NM_000081.3(LYST):c.925C>T (p.Arg309Ter)	235973193	180621	178795	Pathogenic(Last reviewed: Jan 15, 2015)	Chediak-Higashi syndrome	no assertion criteria provided
NM_000081.3(LYST):c.772T>C (p.Cys258Arg)	235973346	180622	178796	Pathogenic(Last reviewed: Jan 15, 2015)	Chediak-Higashi syndrome	no assertion criteria provided
GRCh37/hg19 1q42.2-44(chr1:234050864-249213059)x3	234050864 - 249213059	253636	248084	Pathogenic(Last reviewed: Jan 20, 2016)	See cases	criteria provided, single submitter
NM_000081.3(LYST):c.5956C>T (p.Arg1986Ter)	235929544	525149	515536	Pathogenic(Last reviewed: Jan 3, 2018)	Chediak-Higashi syndrome	criteria provided, single submitter
GRCh38/hg38 1q42.3-43(chr1:235387992-237270632)x3	235551307 - 237433932	147606	157357	Pathogenic(Last reviewed: Jan 30, 2010)	See cases	no assertion criteria provided
GRCh38/hg38 1q32.2-44(chr1:209963625-248918469)x3	210136970 - 249212668	145652	155403	Pathogenic(Last reviewed: Jan 5, 2011)	See cases	no assertion criteria provided
GRCh37/hg19 1p36.33-q44(chr1:849467-249224684)	849467 - 249224684	442387	436049	Pathogenic(Last reviewed: Jul 14, 2015)	See cases	no assertion criteria provided
NM_000081.3(LYST):c.10345C>T (p.Arg3449Ter)	235866076	280681	264000	Pathogenic(Last reviewed: Jun 29, 2016)	not provided	criteria provided, single submitter
GRCh37/hg19 1q42.2-43(chr1:234605553-240932205)x1	234605553 - 240932205	441651	435313	Pathogenic(Last reviewed: Jun 3, 2014)	See cases	no assertion criteria provided
GRCh38/hg38 1q32.2-44(chr1:207346642-248930485)x3	207519987 - 249224684	155660	165414	Pathogenic(Last reviewed: Mar 10, 2014)	See cases	no assertion criteria provided
GRCh37/hg19 1q42.3-44(chr1:235797384-249224684)x1	235797384 - 249224684	441937	435599	Pathogenic(Last reviewed: May 5, 2014)	See cases	no assertion criteria provided
NM_000081.3(LYST):c.8802-2A>G	235894479	435793	427726	Pathogenic(Last reviewed: Nov 23, 2016)	Chediak-Higashi syndrome	criteria provided, single submitter
GRCh38/hg38 1q41-44(chr1:223815147-248918469)x3	224002849 - 249212668	146575	156326	Pathogenic(Last reviewed: Oct 19, 2010)	See cases	no assertion criteria provided
GRCh38/hg38 1q42.11-44(chr1:224022862-248918469)x3	224210564 - 249212668	148701	158452	Pathogenic(Last reviewed: Sep 16, 2011)	See cases	no assertion criteria provided
GRCh37/hg19 1q42.11-44(chr1:224105294-249224684)x3	224105294 - 249224684	441866	435528	Pathogenic(Last reviewed: Sep 16, 2014)	See cases	no assertion criteria provided
NM_000081.3(LYST):c.3310C>T (p.Arg1104Ter)	235969126	3809	18848	Pathogenic/Likely pathogenic(Last reviewed: Mar 23, 2017)	Chediak-Higashi syndrome, adult type|not provided	criteria provided, multiple submitters, no conflicts
